# Supplementary material for: ESMS and NMR investigations on the interaction of the anticancer drug cisplatin and chemopreventive agent selenomethionine †
Source: Royal Society of Chemistry journal article supplement (doi:10.1039/b008611h), 2001-01-01
Supplement: b008611h-5.doc [file b008611h-5.doc]

Figure S5. 2D [1H,15N] HSQC NMR spectrum of the reaction of 15N-cisplatin with

L-Se-MetH at 1:1 molar ratio and at 310 K, recorded after *ca* 2 h. See text and Figure 5 for the assignment of the cross-peaks.


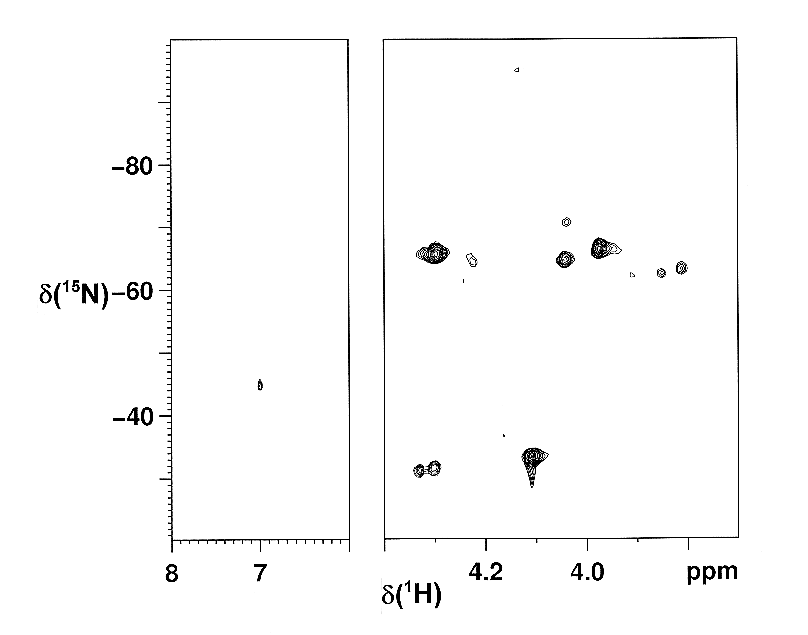


**1a**

**1a’**

**1b**

**3b**

**3b’**

**3a**

**3a’**

**cisplatin**

**?**
